# Supplementary material for: The impact of RNA structure on coding sequence evolution in both bacteria and eukaryotes
Source: PubMed Central journal article supplement (PMC4021280; doi:10.1186/1471-2148-14-87), 2014-04-23
Supplement: 1471-2148-14-87-S2.pdf [file 1471-2148-14-87-S2.pdf]

Table S1. Odds ratio of conservation pattern between structurally disruptive and non-disruptive sites using different cutoffs

| Cutoff of weighed entropy | Cutoff of structural sensitivity | E. coli                |          | Yeast                  |          | Fly                    |          | Mouse                  |          |
|---------------------------|----------------------------------|------------------------|----------|------------------------|----------|------------------------|----------|------------------------|----------|
|                           |                                  | <i>OR</i> <sup>a</sup> | <i>P</i> | <i>OR</i> <sup>a</sup> | <i>P</i> | <i>OR</i> <sup>a</sup> | <i>P</i> | <i>OR</i> <sup>a</sup> | <i>P</i> |
| 0.25                      | 0.05                             | 1.15                   | 1.7E-18  | 1.03                   | 1.8E-01  | 1.07                   | 6.0E-11  | 1.02                   | 7.2E-07  |
| 0.25                      | 0.1                              | 1.21                   | 1.9E-23  | 1.07                   | 3.5E-02  | 1.09                   | 2.3E-10  | 1.04                   | 2.2E-14  |
| 0.5                       | 0.05                             | 1.14                   | 1.1E-17  | 1.04                   | 3.7E-02  | 1.05                   | 4.0E-09  | 1.02                   | 8.6E-09  |
| 0.5                       | 0.1                              | 1.20                   | 1.6E-21  | 1.07                   | 1.5E-02  | 1.06                   | 1.2E-07  | 1.04                   | 2.3E-16  |

<sup>a</sup> *OR* is the abbreviation of odds ratio.
