# Supplementary material for: The impact of RNA structure on coding sequence evolution in both bacteria and eukaryotes
Source: PubMed Central journal article supplement (PMC4021280; doi:10.1186/1471-2148-14-87), 2014-04-23

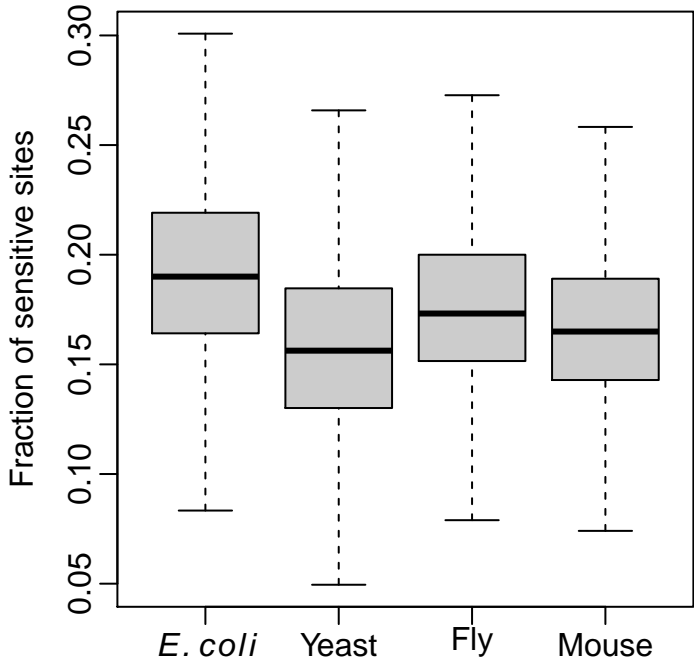

Supplement: 1471-2148-14-87-S3.pdf [file 1471-2148-14-87-S3.pdf]
