# Supplementary material for: The impact of RNA structure on coding sequence evolution in both bacteria and eukaryotes
Source: PubMed Central journal article supplement (PMC4021280; doi:10.1186/1471-2148-14-87), 2014-04-23

*E. coli*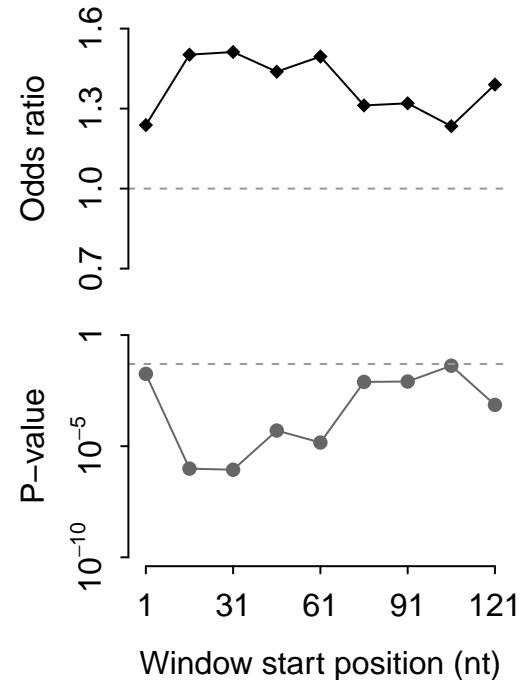*S. cerevisiae*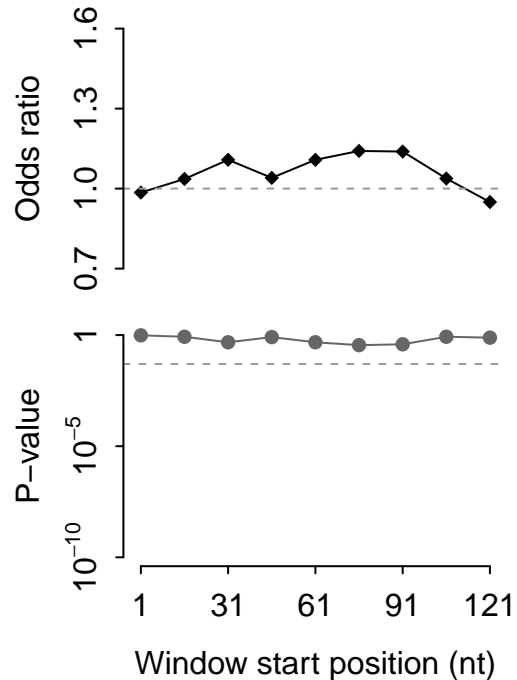*D. melanogaster*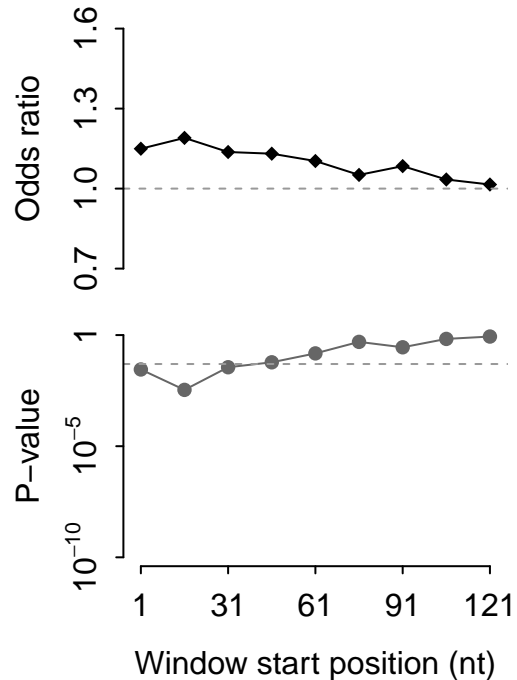*M. musculus*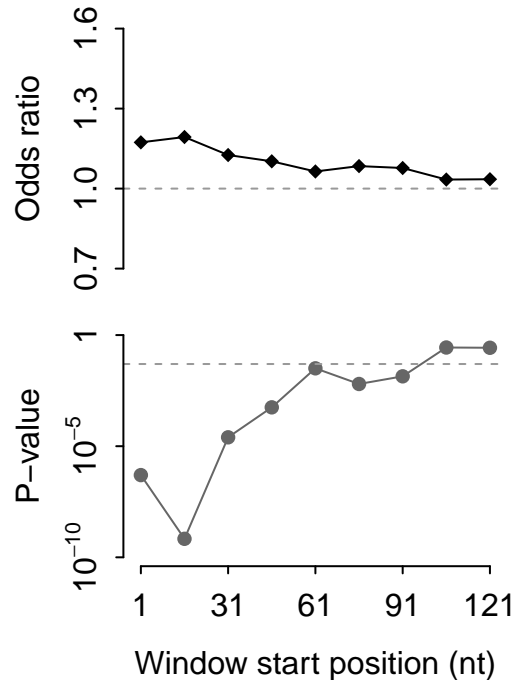

Supplement: 1471-2148-14-87-S5.pdf [file 1471-2148-14-87-S5.pdf]
