# Supplementary material for: The impact of RNA structure on coding sequence evolution in both bacteria and eukaryotes
Source: PubMed Central journal article supplement (PMC4021280; doi:10.1186/1471-2148-14-87), 2014-04-23
Supplement: 1471-2148-14-87-S8.pdf [file 1471-2148-14-87-S8.pdf]

Table S2. Codons with 4-fold degenerate sites

| Amino acid | Codons             |
|------------|--------------------|
| Ala/A      | GCU, GCC, GCA, GCG |
| Arg/R      | CGU, CGC, CGA, CGG |
| Gly/G      | GGU, GGC, GGA, GGG |
| Leu/L      | CUU, CUC, CUA, CUG |
| Pro/P      | CCU, CCC, CCA, CCG |
| Ser/S      | UCU, UCC, UCA, UCG |
| Thr/T      | ACU, ACC, ACA, ACG |
| Val/V      | GUU, GUC, GUA, GUG |
